# Supplementary material for: A Pooled Analysis of Eight Clinical Studies Suggests a Link Between Influenza-Like Symptoms and Pharmacodynamics of the Toll-Like Receptor-7 Agonist Vesatolimod
Source: PubMed Central journal article supplement — Infect Dis Ther. 2024 Sep 15;13(11):2285–99. doi: 10.1007/s40121-024-01034-w (PMC11499514; doi:10.1007/s40121-024-01034-w), 2024-09-15

## Supplementary Materials

### **A Pooled Analysis of Eight Clinical Studies Suggests a Link between Influenza-Like Symptoms and Pharmacodynamics of the Toll-Like Receptor 7 Agonist Vesatolimod**

Sharon A. Riddler,<sup>1</sup> Constance A. Benson,<sup>2</sup> Cynthia Brinson,<sup>3</sup> Steven G. Deeks,<sup>4</sup> Edwin DeJesus,<sup>5</sup> Anthony Mills,<sup>6</sup> Michael F. Para,<sup>7</sup> Moti N. Ramgopal,<sup>8</sup> Yanhui Cai,<sup>9</sup> Yanan Zheng,<sup>9</sup> Liao Zhang,<sup>9</sup> Wendy Jiang,<sup>9</sup> Xiaopeng Liu,<sup>9</sup> Donovan Verrill,<sup>9</sup> Daina Lim,<sup>9</sup> Christiaan R. de Vries,<sup>9</sup> Jeffrey J. Wallin,<sup>9</sup> Elena Vendrame,<sup>9</sup> Devi SenGupta<sup>9#</sup>

<sup>1</sup>Department of Medicine, University of Pittsburgh, Pittsburgh, Pennsylvania, USA; <sup>2</sup>Department of Medicine, UC San Diego, San Diego, California, USA; <sup>3</sup>Central Texas Clinical Research, Austin, Texas, USA; <sup>4</sup>Department of Medicine, University of California San Francisco, San Francisco, California, USA; <sup>5</sup>Orlando Immunology Center, Orlando, Florida, USA; <sup>6</sup>Men's Health Foundation, Los Angeles, California, USA; <sup>7</sup>The Ohio State University Wexner Medical Center, Columbus, Ohio, USA; <sup>8</sup>Midway Specialty Care Center, Fort Pierce, Florida, USA; <sup>9</sup>Gilead Sciences, Inc., Foster City, California, USA

#Correspondence: Devi SenGupta, Gilead Sciences, Inc., Foster City, California, USA. Tel: [\(+1 650\) 574-3000](tel:+16505743000). Email: [devi.sengupta@gilead.com](mailto:devi.sengupta@gilead.com)

## **Table of Contents**

**Supplemental Text 1. Vesatolimod Dose Strategy Across eight Clinical Studies**

**Supplemental Text 2. Tukey's Trend Test Method**

**Table S1. Summary of eight studies included in pooled analysis**

**Table S2. Vesatolimod dose levels by study**

**Table S3. No. of doses administered by study; includes vesatolimod and placebo**

**Table S4. Gilead grading scale for severity of adverse events**

**Table S5. MedDRA preferred terms selected for analysis of influenza-like adverse events and influenza-like adverse events of interest**

**Table S6. Biomarker assays**

**Table S7. Participant demographic characteristics**

**Table S8. Summary of influenza-like adverse events; all grades/fasted**

**Table S9. Baseline ITAC, IFN $\alpha$ , IL-6, and TNF $\alpha$  are predictive biomarkers for influenza-like adverse events of interest after first vesatolimod dose**

**Table S10. Baseline ITAC, IFN $\alpha$ , IL-6, TNF $\alpha$ , and IFN $\gamma$  are prognostic biomarkers for influenza-like adverse events of interest after first vesatolimod dose**

**Table S11. Demographic summary according to rs179008 (TLR7 SNP) genotype**

**Table S12. Demographic summary according to rs3853839 (TLR7 SNP) genotype**

**Fig. S1. Vesatolimod dose levels in participants with and without influenza-like adverse events of interest**

**Fig. S2. Changes in markers of inflammation associated with CRS in participants with and without influenza-like adverse events of interest 24 h postdose**

**Fig. S3. Significant differences in pharmacodynamic and inflammatory biomarkers between participants with and without influenza-like adverse events of interest 24 h after first dose**

**Fig. S4. No significant differences in IFN $\gamma$ , TNF $\alpha$ , CRP, ISG15, MX1, and OAS1 in participants with and without influenza-like adverse events of interest 24 hours after first dose**

### **Supplemental Text 1. Vesatolimod dose strategy across eight clinical studies**

For GS-US-243-0101, there were seven VES dose groups (0.3, 1, 2, 4, 6, 8, and 12 mg). Each group included six healthy participants, except the VES 8-mg group (n = 19). The VES dose in the four studies involving PWHBV (n = 394) was capped at 4 mg and included four doses (0.3, 1, 2, and 4 mg). GS-US-283-0102 (N = 43) and GS-US-283-0106 (N = 41) included all four dose groups. GS-US-283-1059 (N = 146) and GS-US-283-1062 (N = 164) included only three dose groups (1, 2, and 4 mg). Participants were balanced between groups in each study. Across these four HBV studies, the numbers of participants who received each VES dose were as follows: 0.3 mg, 21 participants; 1 mg, 124 participants; 2 mg, 127 participants; and 4 mg, 122 participants. The two placebo-controlled studies in PWH (N = 53) were GS-US-382-1450 (seven dose groups, 1–12 mg; N = 36) and GS-US-382-3961 (three dose groups, 4–8 mg; N = 7). For GS-US-382-1450, each VES group contained six participants (including six escalated from 10–12 mg). While GS-US-382-3961 was underway, additional data emerged that suggested higher VES doses than originally planned would be safe and potentially more effective. The initial VES dose of 4 mg was increased to 6 mg and then eventually to 8 mg. Intraparticipant dose escalations within the VES group were performed as follows: two participants received 4 mg only, four participants received 4 and 6 mg, five participants received 6 mg only, three participants received 6 and 8 mg, and three participants received 8 mg only (**Tables S2 and S3**).

### **Supplemental Text 2. Tukey trend test method**

The ordinal scale (1 = placebo; 2 = VES 0.3 mg; 3 = VES 1 mg; 4 = VES 2 mg; 5 = VES 4 mg; 6 = VES 6 mg; 7 = VES 8 mg; 8 = VES 10 mg; and 9 = VES 12 mg) was used to identify the optimal dose combination for predicting flu-like AEI at first visit after VES administration. Similarly, participants with VES 10 or 12 mg were combined (ie, treatment modified for grouped scale: 0 = placebo; 1 = VES 0.3 mg; 1 = VES 1 mg; 1 = VES 2 mg; 1 = VES 4 mg; 1 = VES 6 mg; 1 = VES 8 mg; 2 = VES 10 mg; and 2 = VES 12 mg) to evaluate prognostic and predictive modeling along with the ordinal scale from Tukey's trend test. In the generalized linear mixed-effect model, using the formula shown below, flu-like AEI is treated as a binary outcome and each distinct trail as the random effect. The covariates included age, sex at birth, and race. Post-hoc Tukey trend test was performed by first fitting a linear regression model and then performing statistical analysis for significance, with *P* values < .05 obtained using a grouped mixed-effect model for probability used as an indication for probability of having a flu-like AEI after the first VES administration.

**Table S1** Summary of eight studies included in pooled analysis

| Study/<br>ClinicalTrials.gov ID | Population                           | Design                                                                                                   | Total participants<br>(VES/placebo) | VES administration                  | VES dose, mg           | Endpoints                                                   |
|---------------------------------|--------------------------------------|----------------------------------------------------------------------------------------------------------|-------------------------------------|-------------------------------------|------------------------|-------------------------------------------------------------|
| GS-US-243-0101/<br>NA           | Healthy participants                 | Phase 1, randomized, double-blind, placebo-controlled study                                              | 75 (55/20)                          | Single oral dose                    | 0.3, 1, 2, 4, 6, 8, 12 | Safety, tolerability, PK, and PD of VES                     |
| GS-US-283-0102/<br>NCT01590654  | Virologically suppressed chronic HBV | Phase 1, double-blind, randomized, placebo-controlled, single- and multiple-dose-ranging, adaptive study | 51 (43/8)                           | Single dose or 2 doses 1 week apart | 0.3, 1, 2, 4           | Safety, tolerability, PK, PD, and antiviral activity of VES |
| GS-US-283-0106/<br>NCT01590641  | Treatment-naive chronic HBV          | Phase 1, double-blind, randomized, placebo-controlled, single- and multiple-dose-ranging, adaptive study | 49 (41/8)                           | Single dose or 2 doses 1 week apart | 0.3, 1, 2, 4           |                                                             |
| GS-US-283-1059/<br>NCT02166047  | Virologically suppressed chronic HBV | Phase 1, double-blind, randomized, placebo-controlled, multiple-dose-ranging, adaptive study             | 162 (146/16)                        | Weekly dose for 12 week             | 1, 2, 4                |                                                             |
| GS-US-283-1062/<br>NCT02579382  | Chronic HBV not on treatment         | Phase 2, randomized, double-blind, placebo-controlled, multicenter study                                 | 192 (164/28)                        | Weekly dose for 12 week             | 1, 2, 4                | Safety and efficacy of VES in combination with TDF          |
| GS-US-382-1450/<br>NCT02858401  | Virologically suppressed HIV-1       | Phase 1b, randomized, blinded, placebo-controlled, dose-escalation study                                 | 48 (36/12)                          | Biweekly dose for 10 week           | 1, 2, 4, 6, 8, 10, 12  | Safety and biological activity of VES                       |
| GS-US-382-3961/<br>NCT03060447  | ART-treated controllers with HIV-1   | Phase 1b, randomized, double-blind, placebo-controlled study                                             | 25 (17/8)                           | Biweekly dose for 10 week           | 4, 6, 8                | Safety and efficacy of VES                                  |
| GS-US-420-5372/<br>NA           | Healthy participants                 | Phase 1 randomized, placebo-controlled, staggered, multiple-ascending-dose study                         | 4 (3/1)                             | Single dose                         | 8                      | Safety, tolerability, and PK of EVM in combination with VES |

*ARV* antiretroviral therapy, *EVM* elipovimab, *HBV* hepatitis B virus, *PD* pharmacodynamic, *PK* pharmacokinetic, *TDF* tenofovir disoproxil fumarate, *VES* vesatolimod.

**TABLE S2** Vesatolimod dose levels by study

| Study          | Placebo<br>(N=101) | 0.3 mg<br>(N=27) | 1 mg<br>(N=136) | 2 mg<br>(N=139) | 4 mg<br>(N=140) | 6 mg<br>(N=24) | 8 mg<br>(N=34) | 10 mg<br>(N=6) | 12 mg<br>(N=12) | All VES<br>(N=505) |
|----------------|--------------------|------------------|-----------------|-----------------|-----------------|----------------|----------------|----------------|-----------------|--------------------|
| GS-US-243-0101 | 20 (19.8%)         | 6 (22.2%)        | 6 (4.4%)        | 6 (4.3%)        | 6 (4.3%)        | 6 (25.0%)      | 19 (55.9%)     | 0              | 6 (50.0%)       | 55 (10.0%)         |
| GS-US-283-0102 | 8 (7.9%)           | 10 (37.0%)       | 11 (8.1%)       | 12 (8.6%)       | 10 (7.1%)       | 0              | 0              | 0              | 0               | 43 (8.5%)          |
| GS-US-283-0106 | 8 (7.9%)           | 11 (40.7%)       | 10 (7.4%)       | 10 (7.2%)       | 10 (7.1%)       | 0              | 0              | 0              | 0               | 41 (8.1%)          |
| GS-US-283-1059 | 16 (15.8%)         | 0                | 50 (36.8%)      | 49 (35.3%)      | 47 (33.6%)      | 0              | 0              | 0              | 0               | 146 (28.9%)        |
| GS-US-283-1062 | 28 (27.7%)         | 0                | 53 (39.0%)      | 56 (40.3%)      | 55 (39.3%)      | 0              | 0              | 0              | 0               | 164 (32.5%)        |
| GS-US-382-1450 | 12 (11.9%)         | 0                | 6 (4.4%)        | 6 (4.3%)        | 6 (4.3%)        | 6 (25.0%)      | 6 (17.6%)      | 6 (100.0%)     | 6 (50.0%)       | 36 (7.1%)          |
| GS-US-382-3961 | 8 (7.9%)           | 0                | 0               | 0               | 6 (4.3%)        | 12 (50.0%)     | 6 (17.6%)      | 0              | 0               | 17 (3.4%)          |
| GS-US-420-5372 | 1 (1.0%)           | 0                | 0               | 0               | 0               | 0              | 3 (8.8%)       | 0              | 0               | 3 (0.6%)           |

Data are n (%).  
VES vesatolimod.

**TABLE S3** No. of doses administered by study; includes vesatolimod and placebo

| Study          | VES dose number |                |                |                |                |                |                |                |                |                |                |                |             |
|----------------|-----------------|----------------|----------------|----------------|----------------|----------------|----------------|----------------|----------------|----------------|----------------|----------------|-------------|
|                | 1<br>(N=606)    | 2<br>(N=472)   | 3<br>(N=422)   | 4<br>(N=420)   | 5<br>(N=369)   | 6<br>(N=366)   | 7<br>(N=341)   | 8<br>(N=340)   | 9<br>(N=287)   | 10<br>(N=281)  | 11<br>(N=234)  | 12<br>(N=228)  | 13<br>(N=2) |
| GS-US-243-0101 | 75<br>(12.4%)   | 0              | 0              | 0              | 0              | 0              | 0              | 0              | 0              | 0              | 0              | 0              | 0           |
| GS-US-283-0102 | 51<br>(8.4%)    | 24<br>(5.1%)   | 0              | 0              | 0              | 0              | 0              | 0              | 0              | 0              | 0              | 0              | 0           |
| GS-US-283-0106 | 49<br>(8.1%)    | 24<br>(5.1%)   | 0              | 0              | 0              | 0              | 0              | 0              | 0              | 0              | 0              | 0              | 0           |
| GS-US-283-1059 | 162<br>(26.7%)  | 160<br>(33.9%) | 160<br>(37.9%) | 159<br>(37.9%) | 108<br>(29.3%) | 108<br>(29.5%) | 107<br>(31.4%) | 107<br>(31.5%) | 54<br>(18.8%)  | 51<br>(18.1%)  | 51<br>(21.8%)  | 49<br>(21.5%)  | 0           |
| GS-US-283-1062 | 192<br>(31.7%)  | 192<br>(40.7%) | 191<br>(45.3%) | 190<br>(45.2%) | 190<br>(51.5%) | 188<br>(51.4%) | 187<br>(54.8%) | 186<br>(54.7%) | 186<br>(64.8%) | 184<br>(65.5%) | 183<br>(78.2%) | 179<br>(78.5%) | 2<br>(100%) |
| GS-US-382-1450 | 48<br>(7.9%)    | 48<br>(10.2%)  | 47<br>(11.1%)  | 47<br>(11.2%)  | 47<br>(12.7%)  | 47<br>(12.8%)  | 24<br>(7.0%)   | 24<br>(7.1%)   | 24<br>(8.4%)   | 23<br>(8.2%)   | 0              | 0              | 0           |
| GS-US-382-3961 | 25<br>(4.1%)    | 24<br>(5.1%)   | 24<br>(5.7%)   | 24<br>(5.7%)   | 24<br>(6.5%)   | 23<br>(6.3%)   | 23<br>(6.7%)   | 23<br>(6.8%)   | 23<br>(8.0%)   | 23<br>(8.2%)   | 0              | 0              | 0           |
| GS-US-420-5372 | 4<br>(0.7%)     | 0              | 0              | 0              | 0              | 0              | 0              | 0              | 0              | 0              | 0              | 0              | 0           |

Data are n (%).  
VES vesatolimod.

**TABLE S4** Gilead grading scale for severity of adverse events

|                                | Grade 1                                                                                                                                              | Grade 2                                                                                                                                      | Grade 3                                                                                                                                                                                                   | Grade 4                                                                                                                                                                                              |
|--------------------------------|------------------------------------------------------------------------------------------------------------------------------------------------------|----------------------------------------------------------------------------------------------------------------------------------------------|-----------------------------------------------------------------------------------------------------------------------------------------------------------------------------------------------------------|------------------------------------------------------------------------------------------------------------------------------------------------------------------------------------------------------|
| Hypotension                    | NA                                                                                                                                                   | Symptomatic, corrected with oral fluid replacement                                                                                           | Symptomatic, IV fluids indicated                                                                                                                                                                          | Shock requiring use of vasopressors or mechanical assistance to maintain blood pressure                                                                                                              |
| Nausea                         | Transient (<24 hours) or intermittent nausea with no or minimal interference with oral intake                                                        | Persistent nausea resulting in decreased oral intake for 24–48 hours                                                                         | Persistent nausea resulting in minimal oral intake for >48 hours OR aggressive rehydration indicated (eg, IV fluids)                                                                                      | Life-threatening consequences (eg, hypotensive shock)                                                                                                                                                |
| Vomiting                       | Transient or intermittent vomiting with no or minimal interference with oral intake                                                                  | Frequent episodes of vomiting with no or mild dehydration                                                                                    | Persistent vomiting resulting in orthostatic hypotension OR aggressive rehydration indicated                                                                                                              | Life-threatening consequences (eg, hypotensive shock)                                                                                                                                                |
| Headache                       | Symptoms causing no or minimal interference with usual social and functional activities                                                              | Symptoms causing greater than minimal interference with usual social and functional activities                                               | Symptoms causing inability to perform usual social and functional activities                                                                                                                              | Symptoms causing inability to perform basic self-care functions OR hospitalization indicated (other than ER visit) OR headache with significant impairment of alertness or other neurologic function |
| Arthralgia                     | Joint pain causing no or minimal interference with usual social and functional activities                                                            | Joint pain causing greater than minimal interference with usual social and functional activities                                             | Joint pain causing inability to perform usual social and functional activities                                                                                                                            | Disabling joint pain causing inability to perform basic self-care functions                                                                                                                          |
| Myalgia                        | Muscle pain causing no or minimal interference with usual social and functional activities                                                           | Muscle pain causing greater than minimal interference with usual social and functional activities                                            | Muscle pain causing inability to perform usual social and functional activities                                                                                                                           | Disabling muscle pain causing inability to perform basic self-care functions                                                                                                                         |
| Chills                         | Symptoms causing no or minimal interference with usual social and functional activities                                                              | Symptoms causing greater than minimal interference with usual social and functional activities                                               | Symptoms causing inability to perform usual social and functional activities                                                                                                                              | NA                                                                                                                                                                                                   |
| Fatigue<br>Malaise             | Symptoms causing no or minimal interference with usual social and functional activities                                                              | Symptoms causing greater than minimal interference with usual social and functional activities                                               | Symptoms causing inability to perform usual social and functional activities                                                                                                                              | Incapacitating fatigue/malaise symptoms causing inability to perform basic self-care functions                                                                                                       |
| Pyrexia                        | 37.7°C to 38.6°C<br>99.8°F to 101.5°F                                                                                                                | 38.7°C to 39.3°C<br>101.6°F to 102.8°F                                                                                                       | 39.4°C to 40.5°C<br>102.9°F to 104.9°F                                                                                                                                                                    | >40.5°C<br>>104.9°F                                                                                                                                                                                  |
| Infection (any other than HIV) | Localized, no systemic antimicrobial treatment indicated AND symptoms causing no or minimal interference with usual social and functional activities | Systemic antimicrobial treatment indicated OR symptoms causing greater than minimal interference with usual social and functional activities | Systemic antimicrobial treatment indicated AND symptoms causing inability to perform usual social and functional activities OR operative intervention (other than simple incision and drainage) indicated | Life-threatening consequences (eg, septic shock)                                                                                                                                                     |

ER emergency room, IV intravenous.

**TABLE S5** MedDRA preferred terms selected for analysis of influenza-like adverse events and influenza-like adverse events of interest

| Flu-like AEs (all grades)               | Flu-like AEI                         |
|-----------------------------------------|--------------------------------------|
| Cytokine release syndrome               | Cytokine release syndrome, any grade |
| Hemophagocytic lymphohistiocytosis      |                                      |
| Cytokine storm                          |                                      |
| Capillary leak syndrome                 |                                      |
| Pyrexia                                 | Pyrexia, any grade                   |
| Chills                                  | Chills, any grade                    |
| Headache                                | Headache, grade $\geq 2$             |
| Fatigue                                 | Fatigue, grade $\geq 2$              |
| Cancer fatigue                          |                                      |
| Nausea                                  |                                      |
| Vomiting                                |                                      |
| Systemic inflammatory response syndrome |                                      |
| Hypotension                             |                                      |
| Hypoxia                                 |                                      |
| Influenza-like illness                  | Influenza-like illness, any grade    |
| Myalgia                                 | Myalgia, grade $\geq 2$              |
| Influenza                               | Influenza, any grade                 |
| Malaise                                 | Malaise, grade $\geq 2$              |

*AE* adverse event, *flu-like AEIs* influenza-like adverse events of interest, *VES* vesatolimod.



**TABLE S6** Biomarker assays

| Study          | Biomarker                        | Assay                                  | Vendor                                                  |
|----------------|----------------------------------|----------------------------------------|---------------------------------------------------------|
| GS-US-283-1059 | IFN $\alpha$                     | Ultrasensitive ELISA                   | Aushon BioSystems, Billerica, Massachusetts, USA        |
|                | IP-10, ITAC, IFN $\gamma$ , IL-6 | Multiplex ELISA                        |                                                         |
| GS-US-283-1062 | IFN $\alpha$                     | Ultrasensitive ELISA                   | Aushon BioSystems                                       |
|                | IP-10, ITAC                      | Multiplex ELISA                        |                                                         |
|                | CD69 <sup>+</sup> NK             | Flow cytometry (whole blood)           | LabCorp, Seattle, Washington, USA                       |
| GS-US-382-1450 | IFN $\alpha$                     | Ultrasensitive Ciraplex cytokine assay | Aushon BioSystems                                       |
|                | IP-10, ITAC, IFN $\gamma$ , IL-6 | Ciraplex cytokine assay                |                                                         |
|                | CRP                              | ELISA                                  | University of Pittsburgh, Pittsburgh, Pennsylvania, USA |
|                | CD69 <sup>+</sup> NK             | Flow cytometry assay (whole blood)     | LabCorp                                                 |
| GS-US-382-3961 | IFN $\alpha$                     | Ultrasensitive Ciraplex cytokine assay | Aushon BioSystems                                       |
|                | IP-10, ITAC, IFN $\gamma$ , IL-6 | Ciraplex cytokine assay                |                                                         |
|                | CRP                              | ELISA                                  | University of Pittsburgh                                |
| GS-US-420-5372 | IFN $\alpha$                     | Single molecule array (SIMOA) assay    | Rules-Based Medicine, Austin, Texas, USA                |
|                | IP-10, ITAC, IFN $\gamma$ , IL-6 | Multiplex ELISA                        |                                                         |
|                | CD69 <sup>+</sup> NK             | Flow cytometry assay (whole blood)     | LabCorp                                                 |

Pharmacodynamic data were obtained from all eight studies included in the pooled analysis; however, details on the biomarker assays were only available for five of the eight studies. Serum concentrations of IFN $\alpha$ , ITAC, IP-10, IL-6, IFN $\gamma$ , and TNF $\alpha$  were quantified using high-sensitivity Ciraplex assays at Aushon BioSystems (GS-US-283-1059, GS-US-283-1062, GS-US-382-1450, and GS-US-382-3961) or Rules-Based Medicine (GS-US-420-5372). An ultrasensitive assay was used to evaluate serum IFN $\alpha$  and IL-1RA concentrations in GS-US-283-1059, GS-US-283-1062, GS-US-382-1450, and GS-US-382-3961 (Aushon) and IFN $\alpha$  concentrations in GS-US-420-5372 (Rules-Based Medicine). Serum CRP concentrations were quantified using ELISA at the University of Pittsburgh (PA, USA) for GS-US-382-1450 and GS-US-382-3961. Additionally, whole blood cell immunophenotyping was analyzed using flow cytometry to evaluate the frequency of activated CD69<sup>+</sup> NK cells (LabCorp Drug Development, Indianapolis, Indiana, USA) for GS-US-382-1450, GS-US-283-1062, and GS-US-420-5372.

CRP C-reactive protein, IFN $\alpha$  interferon- $\alpha$ , IL-1RA interleukin-1 receptor antagonist, IP-10 interferon- $\gamma$ -induced protein 10kDa, ITAC interferon-inducible T-cell- $\alpha$  chemoattractant, NK natural killer.

**TABLE S7** Participant demographics

|                           | Healthy volunteers |             | People with HIV |              | People with HBV |              |             |              | Total        |
|---------------------------|--------------------|-------------|-----------------|--------------|-----------------|--------------|-------------|--------------|--------------|
|                           | 243-0101           | 420-5372    | 382-1450        | 382-3961     | 283-0102        | 283-0106     | 283-1059    | 283-1062     |              |
| <b>Age</b>                |                    |             |                 |              |                 |              |             |              |              |
| N                         | 75                 | 4           | 48              | 25           | 51              | 49           | 162         | 192          | 606          |
| Mean (SD)                 | 29.8 (8.51)        | 40.5 (4.20) | 45.6 (10.91)    | 46.5 (11.16) | 44.4 (10.39)    | 38.9 (11.19) | 47.9 (9.70) | 42.3 (10.14) | 42.6 (11.41) |
| Median                    | 27.0               | 40.5        | 47.0            | 45.0         | 43.0            | 37.0         | 49.5        | 42.0         | 43.0         |
| Q1, Q3                    | 23.0, 35.0         | 37.0, 44.0  | 39.0, 54.0      | 37.0, 53.0   | 37.0, 53.0      | 30.0, 48.0   | 41.0, 55.0  | 35.0, 49.0   | 34.0, 51.0   |
| Min, max                  | 18.0, 51.0         | 36.0, 45.0  | 23.0, 66.0      | 27.0, 66.0   | 23.0, 65.0      | 19.0, 61.0   | 25.0, 65.0  | 20.0, 65.0   | 18.0, 66.0   |
| <b>Sex</b>                |                    |             |                 |              |                 |              |             |              |              |
| Male                      | 55 (73.3%)         | 3 (75.0%)   | 43 (89.6%)      | 21 (84.0%)   | 40 (78.4%)      | 34 (69.4%)   | 123 (75.9%) | 123 (64.1%)  | 442 (72.9%)  |
| Female                    | 20 (26.7%)         | 1 (25.0%)   | 5 (10.4%)       | 4 (16.0%)    | 11 (21.6%)      | 15 (30.6%)   | 39 (24.1%)  | 69 (35.9%)   | 164 (27.1%)  |
| <b>Race</b>               |                    |             |                 |              |                 |              |             |              |              |
| Asian or Native Hawaiian  | 0                  | 0           | 0               | 0            | 33 (64.7%)      | 23 (46.9%)   | 120 (74.1%) | 157 (81.8%)  | 333 (55.0%)  |
| Black or African American | 16 (21.3%)         | 0           | 2 (4.2%)        | 8 (32.0%)    | 4 (7.8%)        | 15 (30.6%)   | 4 (2.5%)    | 9 (4.7%)     | 58 (9.6%)    |
| White                     | 58 (77.3%)         | 4 (100.0%)  | 46 (95.8%)      | 17 (68.0%)   | 12 (23.5%)      | 6 (12.2%)    | 37 (22.8%)  | 25 (13.0%)   | 205 (33.8%)  |
| Other                     | 1 (1.3%)           | 0           | 0               | 0            | 2 (3.9%)        | 5 (10.2%)    | 1 (0.6%)    | 1 (0.5%)     | 10 (1.7%)    |

*HBV* hepatitis B virus, *Q* quartile, *SD* standard deviation.

**TABLE S8** Summary of influenza-like adverse events; all grades/fasted

| Participants, n (%)          | Placebo<br>n=101 | 0.3 mg<br>n=27 | 1 mg<br>n=136 | 2 mg<br>n=139 | 4 mg<br>n=140 | 6 mg<br>n=24 | 8 mg<br>n=21 | 10/12 mg<br>n=12 | All VES<br>n=492 |
|------------------------------|------------------|----------------|---------------|---------------|---------------|--------------|--------------|------------------|------------------|
| Any flu-like AE <sup>a</sup> | 31 (31%)         | 5 (19%)        | 51 (38%)      | 46 (33%)      | 62 (44%)      | 9 (38%)      | 13 (62%)     | 9 (75%)          | 194 (39%)        |
| Headache                     | 21 (21%)         | 1 (4%)         | 23 (17%)      | 27 (19%)      | 27 (19%)      | 2 (8%)       | 6 (29%)      | 5 (42%)          | 91 (19%)         |
| Fatigue                      | 14 (14%)         | 2 (7%)         | 20 (15%)      | 14 (10%)      | 23 (16%)      | 3 (13%)      | 0            | 3 (25%)          | 65 (13%)         |
| Pyrexia                      | 3 (3%)           | 1 (4%)         | 9 (7%)        | 8 (6%)        | 18 (13%)      | 1 (4%)       | 3 (14%)      | 6 (50%)          | 46 (9%)          |
| Myalgia                      | 5 (5%)           | 3 (11%)        | 9 (7%)        | 7 (5%)        | 14 (10%)      | 2 (8%)       | 4 (19%)      | 5 (42%)          | 44 (9%)          |
| Chills                       | 2 (2%)           | 0              | 3 (2%)        | 9 (7%)        | 13 (9%)       | 0            | 4 (19%)      | 6 (50%)          | 35 (7%)          |
| Nausea                       | 5 (5%)           | 0              | 12 (9%)       | 7 (5%)        | 8 (6%)        | 2 (8%)       | 3 (14%)      | 2 (17%)          | 34 (7%)          |
| Arthralgia                   | 1 (1%)           | 0              | 2 (2%)        | 2 (1%)        | 12 (9%)       | 3 (13%)      | 0            | 0                | 19 (4%)          |
| Influenza-like illness       | 0                | 0              | 7 (5%)        | 1 (1%)        | 9 (6%)        | 0            | 0            | 0                | 17 (3%)          |
| Vomiting                     | 1 (1%)           | 0              | 3 (2%)        | 0             | 6 (4%)        | 0            | 1 (5%)       | 0                | 10 (2%)          |
| Malaise                      | 1 (1%)           | 0              | 0             | 0             | 5 (4%)        | 0            | 1 (5%)       | 0                | 6 (1%)           |
| Influenza                    | 0                | 0              | 2 (2%)        | 0             | 1 (1%)        | 0            | 0            | 0                | 3 (1%)           |
| Cytokine release syndrome    | 0                | 0              | 0             | 0             | 0             | 0            | 1 (5%)       | 0                | 1 (<1%)          |
| Hypotension                  | 1 (1%)           | 0              | 0             | 0             | 1 (1%)        | 0            | 0            | 0                | 1 (<1%)          |

Fasted state excluded participants who received VES with a high-fat meal, moderate-fat meal, or 4 h after a high-fat meal. Six participants received placebo with a meal. Eighteen participants were treated with VES 8 mg immediately after a high-fat or moderate-fat meal, or 4 h after a high-fat meal (n=6 per group). Among those, five participants crossed over from the fasted group to the high-fat meal group after a 1-month washout. Four participants in GS-US-382-3961 crossed over from VES 4 mg to 6 mg and three participants in GS-US-382-3961 crossed over from VES 6 mg to 8 mg after a washout. Multiple AEs were counted only once per participant for each preferred term.

AE adverse event, VES vesatolimod.

<sup>a</sup>There were no reported AEs of hemophagocytic lymphohistiocytosis, cytokine storm, capillary leak syndrome, cancer fatigue, hypoxia, or systemic inflammatory response syndrome.

**TABLE S9** Baseline ITAC, IFN $\alpha$ , IL-6, and TNF $\alpha$  are predictive biomarkers for influenza-like adverse events of interest after first vesatolimod dose

| Effect        | Treatment scale | Estimate | SE    | DF  | t value | Pr >  t |
|---------------|-----------------|----------|-------|-----|---------|---------|
| CRP           | Linear          | 0.476    | 0.347 | 66  | 1.37    | 0.1746  |
|               | Ordinal         | 0.850    | 0.563 | 66  | 1.51    | 0.1355  |
|               | Grouped         | 2.497    | 2.179 | 66  | 1.15    | 0.2559  |
| CXCL10 (IP10) | Linear          | -0.017   | 0.140 | 422 | -0.12   | 0.9009  |
|               | Ordinal         | -0.024   | 0.244 | 422 | -0.10   | 0.9215  |
|               | Grouped         | 0.797    | 1.111 | 422 | 0.72    | 0.4737  |
| CXCL11 (ITAC) | Linear          | -0.225   | 0.137 | 473 | -1.64   | 0.1008  |
|               | Ordinal         | -0.544   | 0.239 | 473 | -2.27   | 0.0236  |
|               | Grouped         | -2.375   | 1.082 | 413 | -2.20   | 0.0286  |
| IFN $\alpha$  | Linear          | -0.038   | 0.236 | 473 | -0.16   | 0.8715  |
|               | Ordinal         | -0.467   | 0.317 | 473 | -1.47   | 0.1419  |
|               | Grouped         | -3.403   | 1.215 | 473 | -2.80   | 0.0053  |
| IFN $\gamma$  | Linear          | -0.154   | 0.145 | 281 | -1.06   | 0.2892  |
|               | Ordinal         | -0.258   | 0.249 | 281 | -1.04   | 0.3009  |
|               | Grouped         | -0.621   | 1.358 | 281 | -0.46   | 0.6479  |
| IL-1RA        | Linear          | 0.074    | 0.236 | 120 | 0.31    | 0.7535  |
|               | Ordinal         | 0.302    | 0.435 | 120 | 0.69    | 0.4884  |
|               | Grouped         | -0.183   | 1.446 | 120 | -0.13   | 0.8996  |
| IL-6          | Linear          | -0.295   | 0.165 | 281 | -1.79   | 0.0742  |
|               | Ordinal         | -0.484   | 0.267 | 281 | -1.81   | 0.0708  |
|               | Grouped         | -3.054   | 1.225 | 281 | -2.49   | 0.0132  |
| NKCD69        | Linear          | 1.532    | 0.983 | 94  | 1.56    | 0.1223  |
|               | Ordinal         | 2.306    | 1.454 | 94  | 1.59    | 0.1161  |
|               | Grouped         | 2.555    | 3.389 | 94  | 0.75    | 0.4527  |
|               | Linear          | -0.158   | 0.144 | 277 | -1.10   | 0.2718  |

|              |         |        |       |     |       |        |
|--------------|---------|--------|-------|-----|-------|--------|
| TNF $\alpha$ | Ordinal | -0.440 | 0.253 | 277 | -1.74 | 0.0826 |
|              | Grouped | -4.006 | 1.462 | 277 | -2.74 | 0.0066 |

Generalized linear mixed-effect model for probability of having flu-like AE at first visit after VES administration. Grouped by treatment on linear scale, ordinal scale or on scale with VES doses combined. All predictive biomarkers/excluded patients with food effect. Only includes flu-like adverse events of interest. Treatment (linear): 0 = placebo, 0.3 = VES 0.3 mg, 1 = VES 1 mg, 2 = VES 2 mg, 4 = VES 4 mg, 6 = VES 6 mg, 8 = VES 8 mg, 10 = VES 10 mg, 12 = VES 12 mg. Treatment (ordinal), 1 = placebo, 2 = VES 0.3 mg, 3 = VES 1 mg, 4 = VES 2 mg, 5 = VES 4 mg, 6 = VES 6 mg, 7 = VES 8 mg, 8 = VES 10 mg, 9 = VES 12 mg. Treatment (grouped); 0 = placebo, 1 = VES 0.3 mg, 1 = VES 1 mg, 1 = VES 2 mg, 1 = VES 4 mg, 1 = VES 6 mg, 1 = VES 8 mg, 2 = VES 10 mg, 2 = VES 12 mg. Biomarker and treatment interaction effects in generalized linear mixed-effect model with chi-square  $P$  value < .05, suggesting potential predictive biomarkers.

*CRP* C-reactive protein, *flu-like AEs* influenza-like adverse events of interest, *IFN $\alpha$*  interferon- $\alpha$ , *IL-1RA* interleukin-1 receptor antagonist, *IP-10* interferon- $\gamma$ -induced protein 10kDa, *NK* natural killer, *TNF  $\alpha$*  tumor necrosis factor-alpha, *VES* vesatolimod.

**TABLE S10** Baseline ITAC, IFN $\alpha$ , IL-6, TNF $\alpha$ , and IFN $\gamma$  are prognostic biomarkers for influenza-like adverse events of interest after first vesatolimod dose

| Effect        | Treatment scale | Estimate | SE    | DF  | t value | Pr >  t |
|---------------|-----------------|----------|-------|-----|---------|---------|
| CRP           | Linear          | -2.402   | 1.962 | 66  | -1.22   | 0.2253  |
|               | Ordinal         | -4.315   | 3.144 | 66  | -1.37   | 0.1745  |
|               | Grouped         | -1.840   | 1.849 | 66  | -1.00   | 0.3231  |
| CXCL10 (IP10) | Linear          | 1.047    | 0.741 | 422 | 1.41    | 0.1583  |
|               | Ordinal         | 1.110    | 1.274 | 422 | 0.87    | 0.3840  |
|               | Grouped         | 0.309    | 1.200 | 422 | 0.26    | 0.7968  |
| CXCL11 (ITAC) | Linear          | 1.426    | 0.660 | 473 | 2.16    | 0.0312  |
|               | Ordinal         | 3.151    | 1.233 | 473 | 2.56    | 0.0109  |
|               | Grouped         | 2.904    | 1.173 | 473 | 2.48    | 0.0137  |
| IFN $\alpha$  | Linear          | 0.573    | 1.000 | 473 | 0.57    | 0.5667  |
|               | Ordinal         | 2.459    | 1.443 | 473 | 1.70    | 0.0890  |
|               | Grouped         | 3.469    | 1.130 | 473 | 3.07    | 0.0023  |
| IFN $\gamma$  | Linear          | 1.755    | 0.844 | 281 | 2.08    | 0.0385  |
|               | Ordinal         | 2.441    | 1.370 | 281 | 1.78    | 0.0760  |
|               | Grouped         | 1.886    | 1.457 | 281 | 1.29    | 0.1966  |
| IL-1RA        | Linear          | -1.463   | 1.682 | 120 | -0.87   | 0.3860  |
|               | Ordinal         | -2.848   | 2.779 | 120 | -1.02   | 0.3075  |
|               | Grouped         | -0.738   | 1.584 | 120 | -0.47   | 0.6422  |
| IL-6          | Linear          | 1.070    | 0.762 | 281 | 1.40    | 0.1614  |
|               | Ordinal         | 2.262    | 1.293 | 281 | 1.75    | 0.0814  |
|               | Grouped         | 3.069    | 1.255 | 281 | 2.45    | 0.0151  |
| NKCD69        | Linear          | -6.122   | 4.611 | 94  | -1.33   | 0.1875  |
|               | Ordinal         | -11.608  | 8.389 | 94  | -1.38   | 0.1697  |
|               | Grouped         | -2.384   | 3.371 | 94  | -0.71   | 0.4812  |
| TNF $\alpha$  | Linear          | 0.970    | 0.831 | 277 | 1.17    | 0.2443  |
|               | Ordinal         | 2.450    | 1.380 | 277 | 1.78    | 0.0769  |

|         |       |       |     |      |        |
|---------|-------|-------|-----|------|--------|
| Grouped | 4.531 | 1.623 | 277 | 2.79 | 0.0056 |
|---------|-------|-------|-----|------|--------|

Generalized linear mixed-effect model for probability of having flu-like AE at first visit after VES administration. Grouped by treatment on linear scale, ordinal scale or on scale with VES doses combined. All predictive biomarkers/excluded patients with food effect. Only includes flu-like AEs. Treatment (linear): 0 = placebo, 0.3 = VES 0.3 mg, 1 = VES 1 mg, 2 = VES 2 mg, 4 = VES 4 mg, 6 = VES 6 mg, 8 = VES 8 mg, 10 = VES 10 mg, 12 = VES 12 mg. Treatment (ordinal), 1 = placebo, 2 = VES 0.3 mg, 3 = VES 1 mg, 4 = VES 2 mg, 5 = VES 4 mg, 6 = VES 6 mg, 7 = VES 8 mg, 8 = VES 10 mg, 9 = VES 12 mg. Treatment (grouped); 0 = placebo, 1 = VES 0.3 mg, 1 = VES 1 mg, 1 = VES 2 mg, 1 = VES 4 mg, 1 = VES 6 mg, 1 = VES 8 mg, 2 = VES 10 mg, 2 = VES 12 mg. Biomarker and treatment interaction effects in generalized linear mixed-effect model with chi square *P* value < .05, suggesting potential predictive biomarkers. *CRP* C-reactive protein, *flu-like AEs* influenza-like adverse events of interest, *IFN $\alpha$*  interferon- $\alpha$ , *IL-1RA* interleukin-1 receptor antagonist, *IP-10* interferon- $\gamma$ -induced protein 10kDa, *ITAC* interferon-inducible T-cell- $\alpha$  chemoattractant, *NK* natural killer, *TNF  $\alpha$*  tumor necrosis factor-alpha, *VES* vesatolimod.

**TABLE S11** Demographic summary according to rs179008 (TLR7 SNP) genotype

|                                           | Genotype for participants with flu-like AEIs |             |             | Genotype for all participants from 8 studies |            |            |
|-------------------------------------------|----------------------------------------------|-------------|-------------|----------------------------------------------|------------|------------|
|                                           | A/A                                          | A/T         | T/T         | A/A                                          | A/T        | T/T        |
| <b>Age</b>                                |                                              |             |             |                                              |            |            |
| N                                         | 81                                           | 5           | 2           | 393                                          | 11         | 18         |
| Mean (SD)                                 | 45.9 (10.61)                                 | 47.6 (6.77) | 52.5 (0.71) | 45 (10.43)                                   | 45 (9.19)  | 43 (9.13)  |
| Median                                    | 45.0                                         | 49.0        | 52.5        | 45.0                                         | 44.0       | 44.0       |
| Q1, Q3                                    | 39.0, 56.0                                   | 41.0, 50.0  | 52.0, 53.0  | 37.0, 53.0                                   | 36.0, 50.0 | 37.0, 51.0 |
| Min, max                                  | 21.0, 65.0                                   | 41.0, 57.0  | 52.0, 53.0  | 20.0, 66.0                                   | 34.0, 63.0 | 27.0, 56.0 |
| <b>Sex</b>                                |                                              |             |             |                                              |            |            |
| Female                                    | 27 (30.7%)                                   | 5 (5.7%)    | 0           | 103 (24.4%)                                  | 11 (2.6%)  | 0          |
| Male                                      | 54 (61.4%)                                   | 0           | 2 (2.3%)    | 290 (68.7%)                                  | 0          | 18 (4.3%)  |
| <b>Race</b>                               |                                              |             |             |                                              |            |            |
| Asian                                     | 46 (52.3%)                                   | 0           | 0           | 265 (62.8%)                                  | 0          | 0          |
| Black or African American                 | 3 (3.4%)                                     | 1 (1.1%)    | 0           | 18 (4.3%)                                    | 1 (0.2%)   | 2 (0.5%)   |
| Native Hawaiian or other Pacific Islander | 0                                            | 0           | 0           | 9 (2.1%)                                     | 0          | 0          |
| White                                     | 32 (36.4%)                                   | 4 (4.5%)    | 2 (2.3%)    | 100 (23.7%)                                  | 10 (2.4%)  | 16 (3.8%)  |
| Other                                     | 0                                            | 0           | 0           | 1 (0.2%)                                     | 0          | 0          |

*Flu-like AEIs* influenza-like adverse events of interest, *Q* quartile, *SD* standard deviation, *SNP* single-nucleotide polymorphism, *TLR7* Toll-like receptor 7 agonist.



**TABLE S12** Demographic summary according to rs3853839 (TLR7 SNP) genotype

|                                           | Genotype for participants with flu-like AEs |             |              | Genotype for all participants from 8 studies |             |              |
|-------------------------------------------|---------------------------------------------|-------------|--------------|----------------------------------------------|-------------|--------------|
|                                           | C/C                                         | C/G         | G/G          | C/C                                          | C/G         | G/G          |
| <b>Age</b>                                |                                             |             |              |                                              |             |              |
| N                                         | 38                                          | 7           | 43           | 158                                          | 40          | 224          |
| Mean (SD)                                 | 46.8 (10.76)                                | 47.9 (7.31) | 45.4 (10.49) | 45.5 (10.90)                                 | 45.6 (8.90) | 44.4 (10.17) |
| Median                                    | 47.0                                        | 47.0        | 44.0         | 45.0                                         | 45.5        | 44.0         |
| Q1, Q3                                    | 40.0, 56.0                                  | 43.0, 52.0  | 39.0, 55.0   | 37.0, 54.0                                   | 39.0, 52.0  | 36.5, 52.0   |
| Min, max                                  | 28.0, 65.0                                  | 38.0, 61.0  | 21.0, 61.0   | 25.0, 66.0                                   | 23.0, 64.0  | 20.0, 65.0   |
| <b>Sex</b>                                |                                             |             |              |                                              |             |              |
| Female                                    | 13 (14.8%)                                  | 7 (8.0%)    | 12 (13.6%)   | 24 (5.7%)                                    | 40 (9.5%)   | 50 (11.8%)   |
| Male                                      | 25 (28.4%)                                  | 0           | 31 (35.2%)   | 134 (31.8%)                                  | 0           | 174 (41.2%)  |
| <b>Race</b>                               |                                             |             |              |                                              |             |              |
| Asian                                     | 9 (10.2%)                                   | 5 (5.7%)    | 32 (36.4%)   | 46 (10.9%)                                   | 32 (7.6%)   | 187 (44.3%)  |
| Black or African American                 | 4 (4.5%)                                    | 0           | 0            | 19 (4.5%)                                    | 1 (0.2%)    | 1 (0.2%)     |
| Native Hawaiian or other Pacific Islander | 0                                           | 0           | 0            | 2 (0.5%)                                     | 0           | 7 (1.7%)     |
| White                                     | 25 (28.4%)                                  | 2 (2.3%)    | 11 (12.5%)   | 91 (21.6%)                                   | 6 (1.4%)    | 29 (6.9%)    |
| Other                                     | 0                                           | 0           | 0            | 0                                            | 1 (0.2%)    | 0            |

*Flu-like AEs* influenza-like adverse events of interest, *Q* quartile, *SD* standard deviation, *SNP* single-nucleotide polymorphism, *TLR7* Toll-like receptor 7 agonist.

**FIG S1** Vesatolimod dose levels in participants with and without influenza-like adverse events of interest. Wilcoxon rank-sum test was used to compare the first VES dose level that was given to participants with versus without flu-like AEI. Median and IQR are shown for the first VES dose level. *Flu-like AEIs* influenza-like adverse events of interest, *IQR* interquartile range, *VES* vesatolimod.

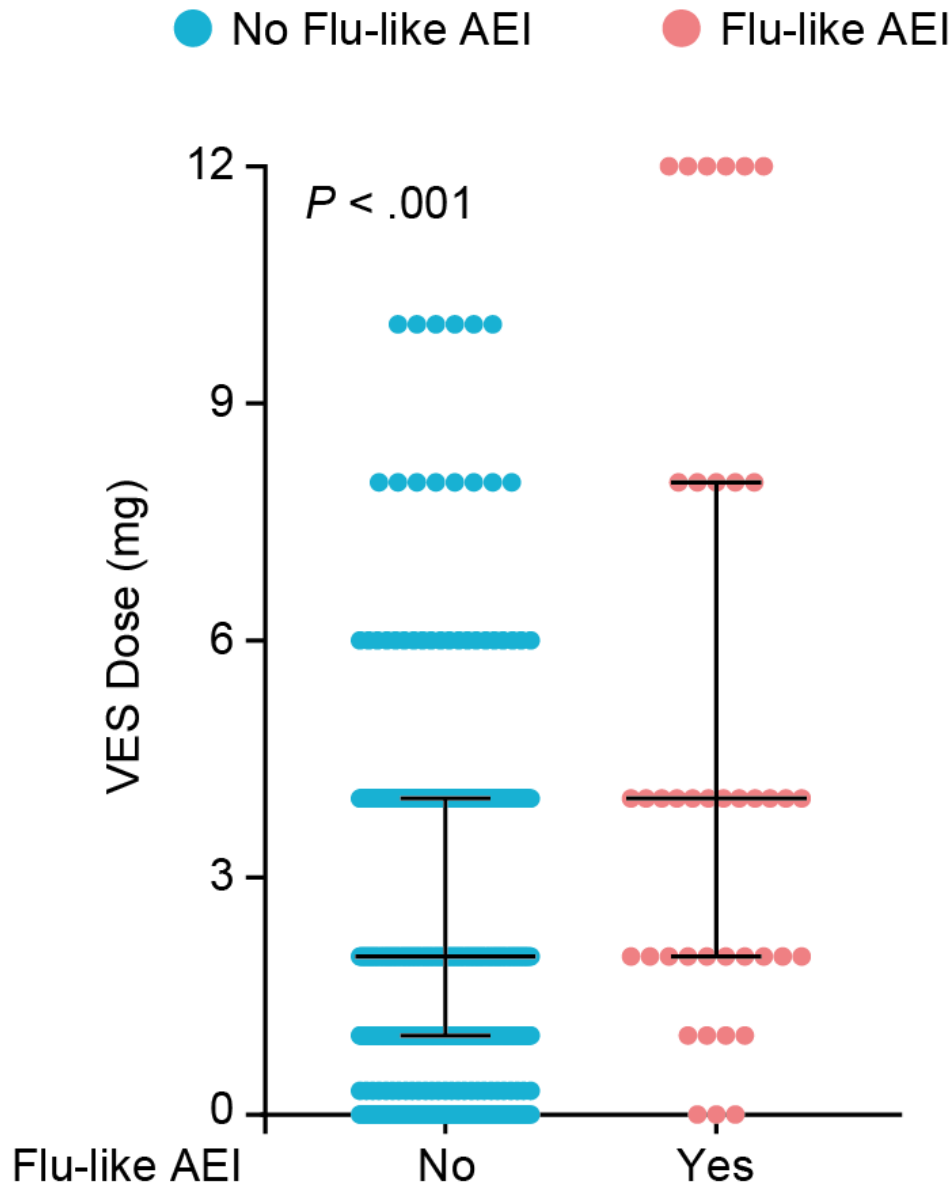

**FIG S2** Changes in markers of inflammation associated with CRS in participants with and without influenza-like adverse events of interest 24 hours postdose.

Fold changes from baseline 24 hours after the first dose for inflammatory biomarkers from all eight VES studies were summarized by VES dose (including all doses with data collected). Note: for participants receiving VES, only those with fasted or empty stomach were included for IL-6 and IFN $\gamma$ . Median, distribution, and IQR are indicated in error bars. Participants presented flu-like AEI are highlighted in red.

CRS cytokine release syndrome, *flu-like AEIs* influenza-like adverse events of interest, *IQR* interquartile range, *VES* vesatolimod.

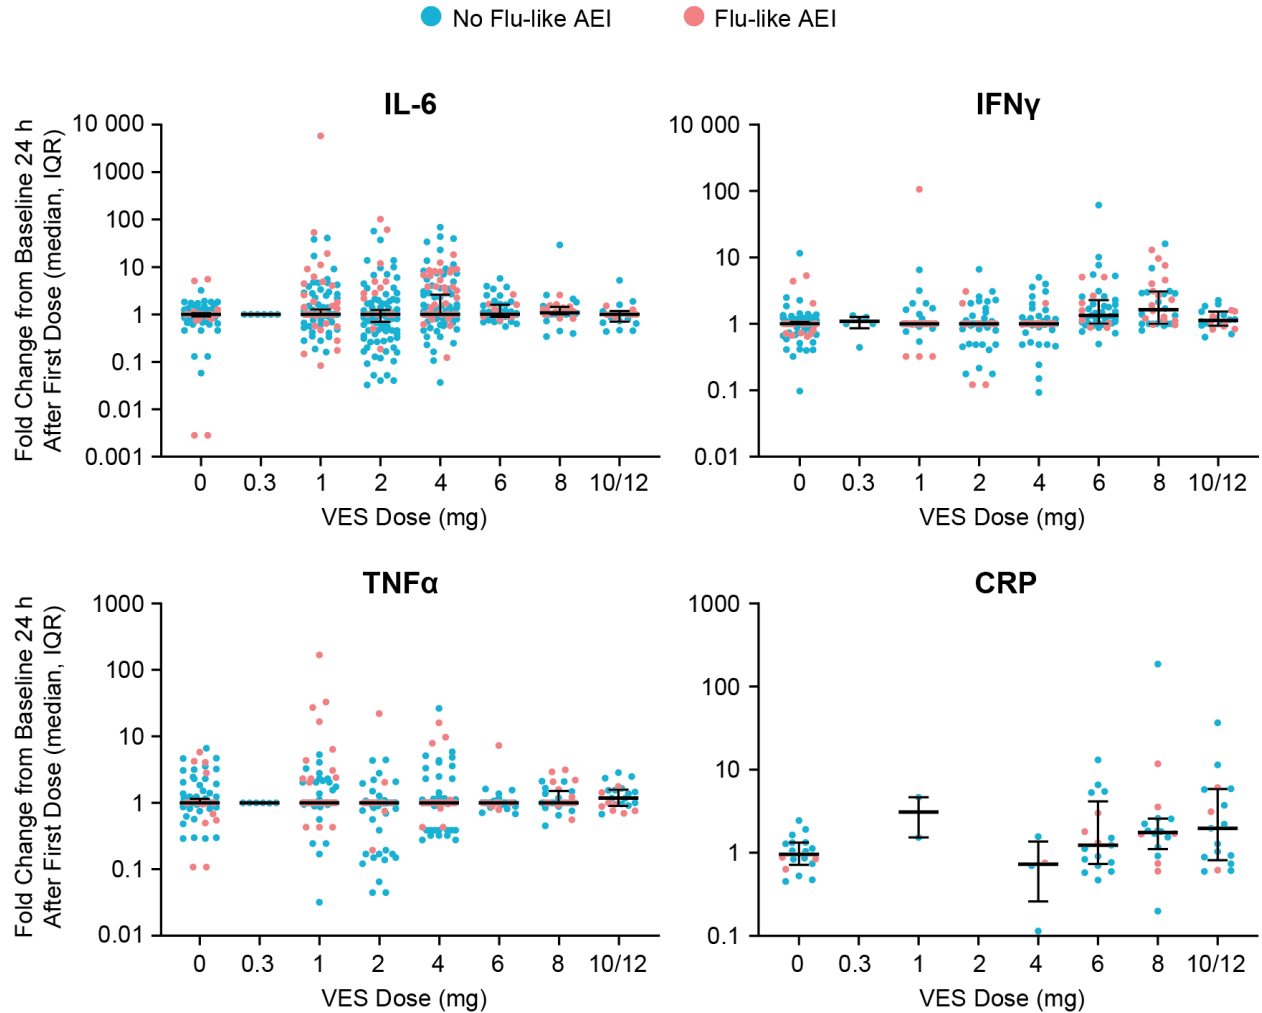

**FIG S3** Significant differences in pharmacodynamic and inflammatory biomarkers between participants with and without influenza-like adverse events of interest 24 hours after first dose.

Fold changes from baseline 24 hours after first dose are shown for PD biomarkers (IFN $\alpha$ , ITAC, IL-1RA, and IP-10 concentrations) and inflammatory biomarkers (IL-6 concentration and incidence of CD69<sup>+</sup> NK cells) in participants with (red color) and without flu-like AEI (blue color) (includes participants who received VES or placebo). Wilcoxon rank-sum test was used to compare fold changes in each biomarker between participants with and without flu-like AEI.

*Flu-like AEIs* influenza-like adverse events of interest, *IQR* interquartile range, *PD* pharmacodynamic, *VES* vesatolimod.

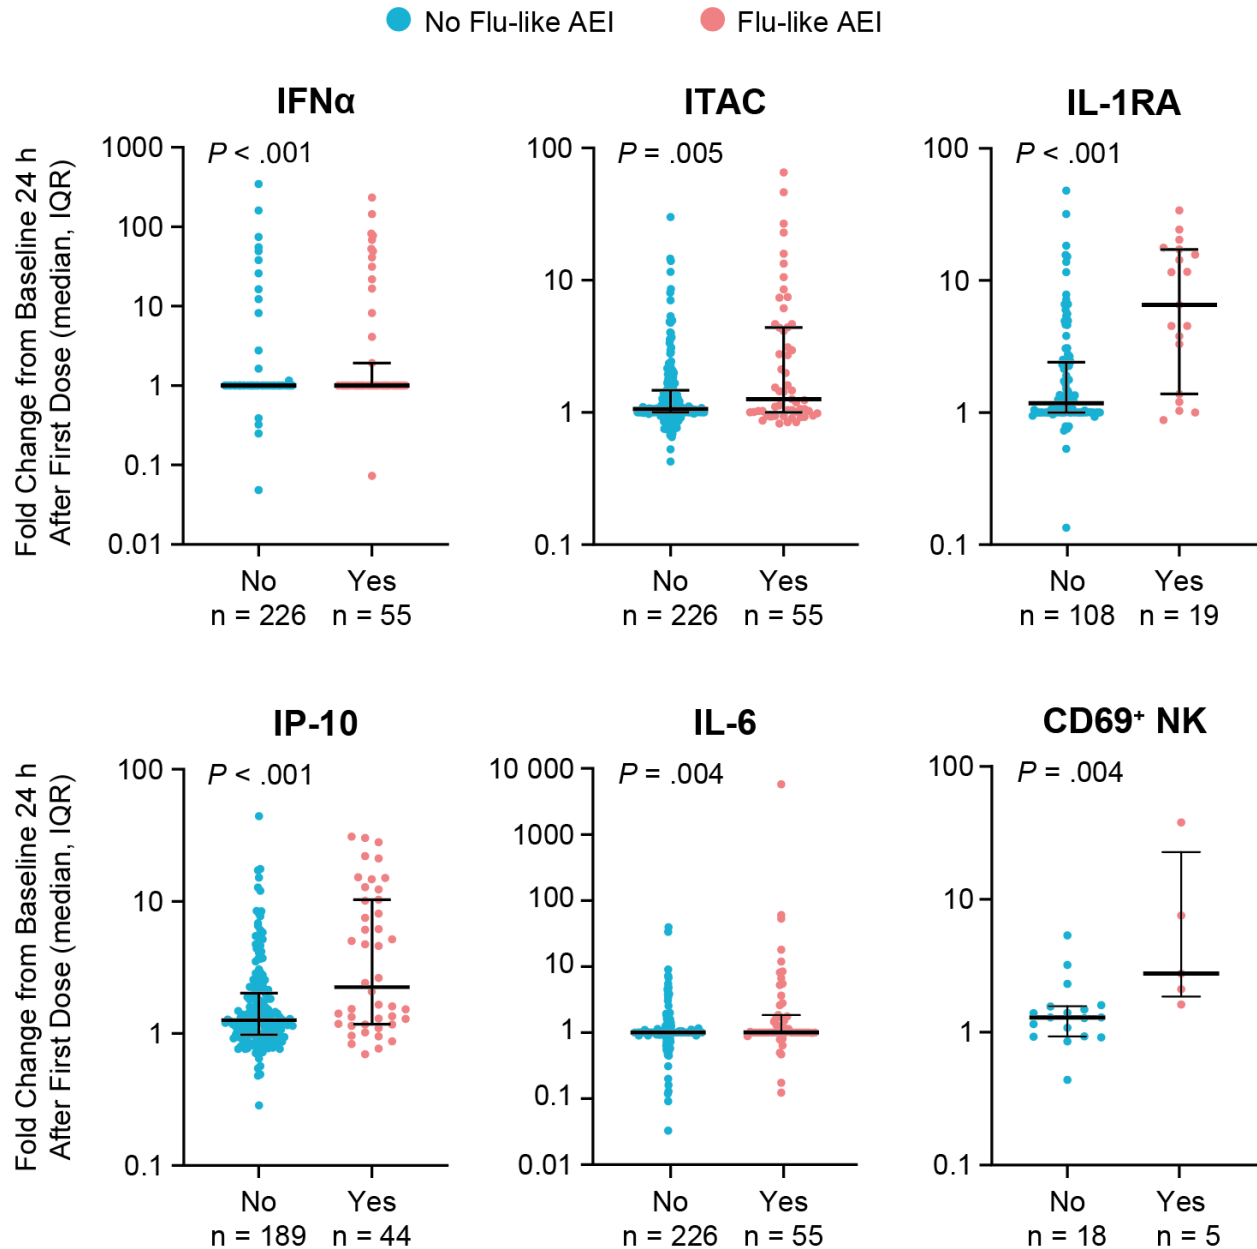

**FIG S4** No significant differences in IFN $\gamma$ , TNF $\alpha$ , CRP, ISG15, MX1, and OAS1 between participants with and without influenza-like adverse events of interest 24 hours after first dose. Wilcoxon rank-sum test was used to compare fold changes of each biomarker between participants with (red) and without flu-like AEI (blue) (includes participants who received VES or placebo). *BL* baseline, *flu-like AEIs* influenza-like adverse events of interest, *IQR* interquartile range, *VES* vesatolimod.

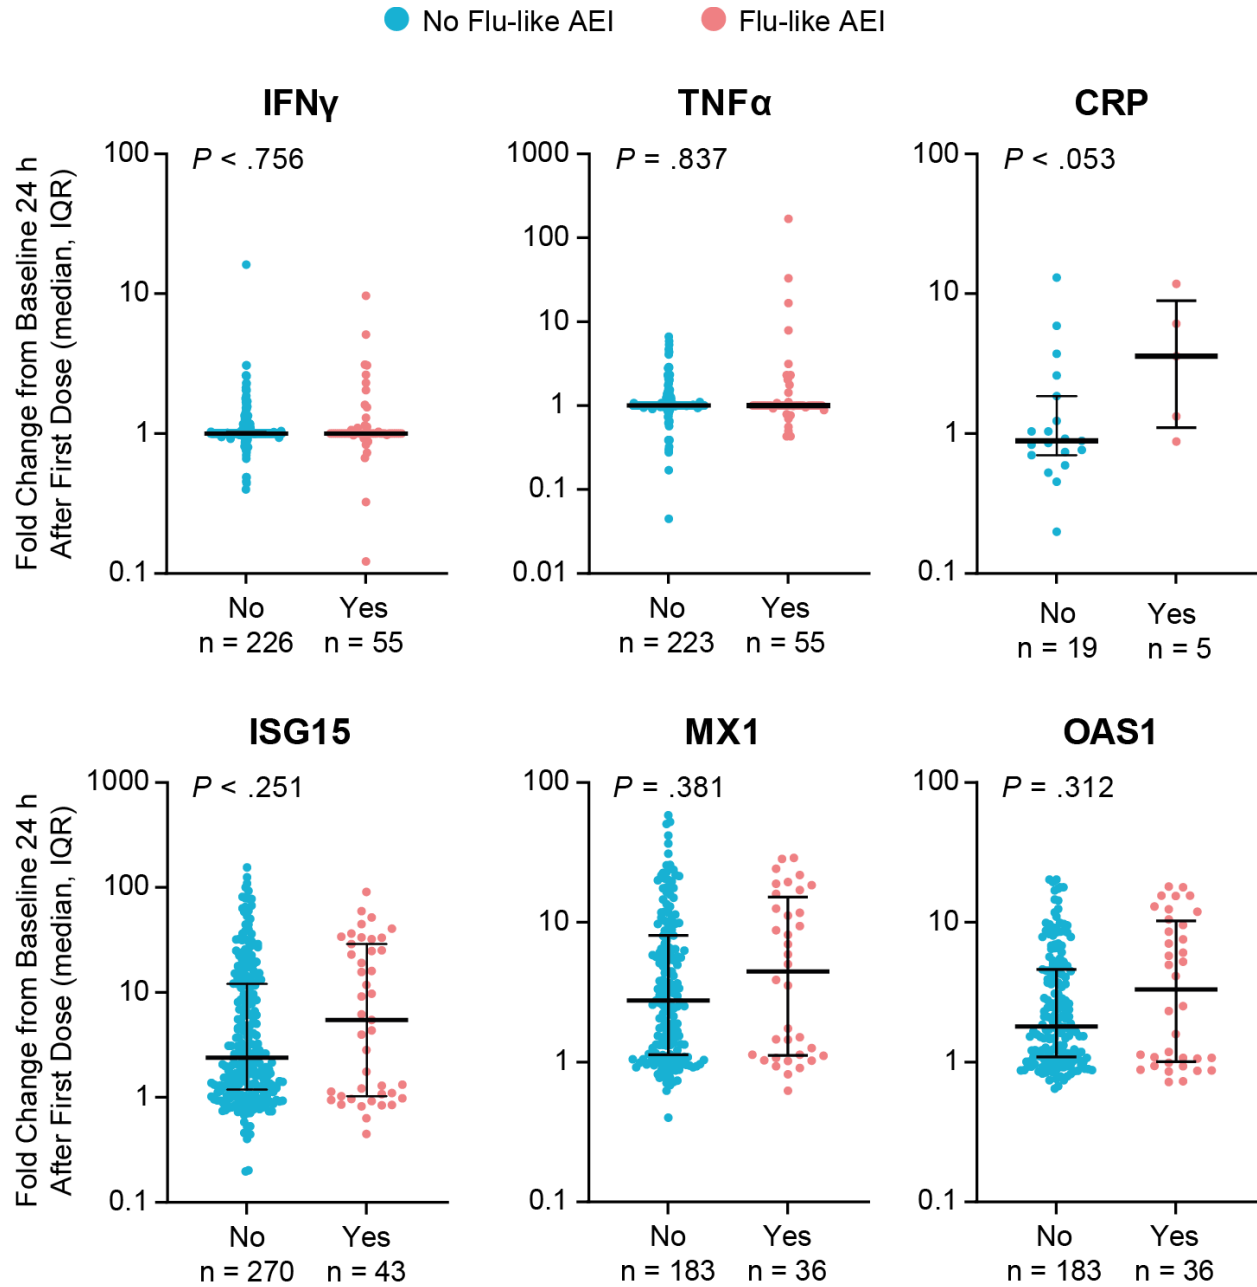

Supplement: 40121_2024_1034_MOESM1_ESM.pdf [file 40121_2024_1034_MOESM1_ESM.pdf]
